# Supplementary material for: Modulation of the immune response by Fonsecaea pedrosoi morphotypes in the course of experimental chromoblastomycosis and their role on inflammatory response chronicity
Source: PubMed Central journal article supplement (PMC5391973; doi:10.1371/journal.pntd.0005461), 2017-03-29
Supplement: pntd.0005461.s007.pdf [file pntd.0005461.s007.pdf]

**Supporting Table 1:** gene ontology enrichment results for biological process categories in macrophage co-culture with *F. pedrosoi* conidia.

| #  | GO.ID      | Term                                        | Annotated | Significant | Expected | Raw.pValue | FDR.corrected |
|----|------------|---------------------------------------------|-----------|-------------|----------|------------|---------------|
| 1  | GO:0006955 | immune response                             | 576       | 12          | 2.21     | 9.9e-07    | 0.0040739     |
| 2  | GO:0002376 | immune system process                       | 1159      | 16          | 4.44     | 2.4e-06    | 0.004938      |
| 3  | GO:0098542 | defense response to other organism          | 196       | 6           | 0.75     | 9.2e-05    | 0.1261933     |
| 4  | GO:0002252 | immune effector process                     | 325       | 7           | 1.24     | 0.00021    | 0.2160375     |
| 5  | GO:0051607 | defense response to virus                   | 109       | 4           | 0.42     | 0.00077    | 0.6103917     |
| 6  | GO:0034097 | response to cytokine                        | 299       | 6           | 1.15     | 0.00089    | 0.6103917     |
| 7  | GO:0009615 | response to virus                           | 135       | 4           | 0.52     | 0.00171    | 0.7893318     |
| 8  | GO:0070098 | chemokine-mediated signaling pathway        | 17        | 2           | 0.07     | 0.00188    | 0.7893318     |
| 9  | GO:0043207 | response to external biotic stimulus        | 353       | 6           | 1.35     | 0.00209    | 0.7893318     |
| 10 | GO:0051707 | response to other organism                  | 353       | 6           | 1.35     | 0.00209    | 0.7893318     |
| 11 | GO:0071345 | cellular response to cytokine stimulus      | 240       | 5           | 0.92     | 0.00211    | 0.7893318     |
| 12 | GO:0002455 | humoral immune response mediated by circ... | 20        | 2           | 0.08     | 0.00260    | 0.8261654     |
| 13 | GO:0009607 | response to biotic stimulus                 | 369       | 6           | 1.41     | 0.00261    | 0.8261654     |
| 14 | GO:0009605 | response to external stimulus               | 888       | 9           | 3.4      | 0.00555    | 1             |
| 15 | GO:0002682 | regulation of immune system process         | 582       | 7           | 2.23     | 0.00606    | 1             |
| 16 | GO:0050896 | response to stimulus                        | 3862      | 23          | 14.79    | 0.00691    | 1             |
| 17 | GO:0050853 | B cell receptor signaling pathway           | 33        | 2           | 0.13     | 0.00701    | 1             |
| 18 | GO:0030100 | regulation of endocytosis                   | 112       | 3           | 0.43     | 0.00890    | 1             |
| 19 | GO:0016525 | negative regulation of angiogenesis         | 41        | 2           | 0.16     | 0.01068    | 1             |
| 20 | GO:0006959 | humoral immune response                     | 49        | 2           | 0.19     | 0.01502    | 1             |
| 21 | GO:0007166 | cell surface receptor signaling pathway     | 1261      | 10          | 4.83     | 0.01819    | 1             |
| 22 | GO:0042113 | B cell activation                           | 147       | 3           | 0.56     | 0.01848    | 1             |
| 23 | GO:0002683 | negative regulation of immune system pro... | 148       | 3           | 0.57     | 0.01881    | 1             |
| 24 | GO:0019221 | cytokine-mediated signaling pathway         | 149       | 3           | 0.57     | 0.01915    | 1             |
| 25 | GO:0042100 | B cell proliferation                        | 56        | 2           | 0.21     | 0.01934    | 1             |
| 26 | GO:0006952 | defense response                            | 570       | 6           | 2.18     | 0.02038    | 1             |
| 27 | GO:0002250 | adaptive immune response                    | 153       | 3           | 0.59     | 0.02053    | 1             |
| 28 | GO:0009266 | response to temperature stimulus            | 60        | 2           | 0.23     | 0.02202    | 1             |
| 29 | GO:0045321 | leukocyte activation                        | 428       | 5           | 1.64     | 0.02289    | 1             |
| 30 | GO:0046651 | lymphocyte proliferation                    | 160       | 3           | 0.61     | 0.02307    | 1             |
| 31 | GO:0032943 | mononuclear cell proliferation              | 161       | 3           | 0.62     | 0.02345    | 1             |
| 32 | GO:0016064 | immunoglobulin mediated immune response     | 63        | 2           | 0.24     | 0.02412    | 1             |
| 33 | GO:0070661 | leukocyte proliferation                     | 164       | 3           | 0.63     | 0.02460    | 1             |
| 34 | GO:0019724 | B cell mediated immunity                    | 65        | 2           | 0.25     | 0.02557    | 1             |
| 35 | GO:0030183 | B cell differentiation                      | 67        | 2           | 0.26     | 0.02705    | 1             |
| 36 | GO:0050851 | antigen receptor-mediated signaling path... | 70        | 2           | 0.27     | 0.02933    | 1             |
| 37 | GO:0050776 | regulation of immune response               | 312       | 4           | 1.19     | 0.03075    | 1             |
| 38 | GO:0019882 | antigen processing and presentation         | 77        | 2           | 0.29     | 0.03495    | 1             |
| 39 | GO:0002429 | immune response-activating cell surface ... | 80        | 2           | 0.31     | 0.03748    | 1             |
| 40 | GO:0002251 | organ or tissue specific immune response    | 10        | 1           | 0.04     | 0.03766    | 1             |
| 41 | GO:0003416 | endochondral bone growth                    | 10        | 1           | 0.04     | 0.03766    | 1             |
| 42 | GO:0042090 | interleukin-12 biosynthetic process         | 10        | 1           | 0.04     | 0.03766    | 1             |
| 43 | GO:0045075 | regulation of interleukin-12 biosyntheti... | 10        | 1           | 0.04     | 0.03766    | 1             |

|    |            |                                             |     |   |      |         |   |
|----|------------|---------------------------------------------|-----|---|------|---------|---|
| 44 | GO:0070570 | regulation of neuron projection regenera... | 10  | 1 | 0.04 | 0.03766 | 1 |
| 45 | GO:2000114 | regulation of establishment of cell pola... | 10  | 1 | 0.04 | 0.03766 | 1 |
| 46 | GO:0060627 | regulation of vesicle-mediated transport    | 195 | 3 | 0.75 | 0.03825 | 1 |
| 47 | GO:0001775 | cell activation                             | 491 | 5 | 1.88 | 0.03827 | 1 |
| 48 | GO:0009409 | response to cold                            | 11  | 1 | 0.04 | 0.04135 | 1 |
| 49 | GO:0034114 | regulation of heterotypic cell-cell adhe... | 11  | 1 | 0.04 | 0.04135 | 1 |
| 50 | GO:0072583 | clathrin-mediated endocytosis               | 11  | 1 | 0.04 | 0.04135 | 1 |
