# Supplementary material for: Modulation of the immune response by Fonsecaea pedrosoi morphotypes in the course of experimental chromoblastomycosis and their role on inflammatory response chronicity
Source: PubMed Central journal article supplement (PMC5391973; doi:10.1371/journal.pntd.0005461), 2017-03-29
Supplement: pntd.0005461.s008.pdf [file pntd.0005461.s008.pdf]

**Supporting Table 2:** gene ontology enrichment results for biological process categories in macrophage co-culture with muriform cells.

| #  | GO.ID      | Term                                        | Annotated | Significant | Expected | Raw.pValue | FDR,corrected |
|----|------------|---------------------------------------------|-----------|-------------|----------|------------|---------------|
| 1  | GO:0002376 | immune system process                       | 1159      | 479         | 371.14   | 1.0e-12    | 5.90E-06      |
| 2  | GO:0006954 | inflammatory response                       | 284       | 146         | 90.94    | 5.5e-12    | 1.62E-03      |
| 3  | GO:0006955 | immune response                             | 576       | 260         | 184.45   | 9.4e-12    | 1.85E-03      |
| 4  | GO:0006952 | defense response                            | 570       | 251         | 182.53   | 4.6e-10    | 6.78E-03      |
| 5  | GO:0048534 | hematopoietic or lymphoid organ developm... | 507       | 225         | 162.35   | 1.7e-09    | 2.01E-01      |
| 6  | GO:0001816 | cytokine production                         | 341       | 161         | 109.2    | 2.1e-09    | 2.06E-02      |
| 7  | GO:0001775 | cell activation                             | 491       | 218         | 157.23   | 2.9e-09    | 2.42E+08      |
| 8  | GO:0002520 | immune system development                   | 537       | 235         | 171.96   | 3.4e-09    | 2.42E+08      |
| 9  | GO:0044707 | single-multicellular organism process       | 2888      | 1050        | 924.81   | 3.7e-09    | 2.42E+08      |
| 10 | GO:0032501 | multicellular organismal process            | 2956      | 1070        | 946.58   | 7.6e-09    | 4.48E-01      |
| 11 | GO:0045321 | leukocyte activation                        | 428       | 192         | 137.06   | 1.0e-08    | 4.92E-03      |
| 12 | GO:0051240 | positive regulation of multicellular org... | 337       | 157         | 107.92   | 1.0e-08    | 4.92E-03      |
| 13 | GO:0002682 | regulation of immune system process         | 582       | 249         | 186.37   | 1.4e-08    | 6.35E+08      |
| 14 | GO:0030097 | hemopoiesis                                 | 488       | 213         | 156.27   | 2.4e-08    | 1.01E+09      |
| 15 | GO:0023052 | signaling                                   | 2648      | 962         | 847.95   | 3.1e-08    | 1.14E+02      |
| 16 | GO:0044700 | single organism signaling                   | 2648      | 962         | 847.95   | 3.1e-08    | 1.14E+02      |
| 17 | GO:0051239 | regulation of multicellular organismal p... | 1257      | 488         | 402.52   | 3.4e-08    | 1.18E-01      |
| 18 | GO:0007165 | signal transduction                         | 2460      | 898         | 787.75   | 4.1e-08    | 1.34E+09      |
| 19 | GO:0002684 | positive regulation of immune system pro... | 359       | 162         | 114.96   | 9.0e-08    | 2.79E+09      |
| 20 | GO:0001817 | regulation of cytokine production           | 302       | 140         | 96.71    | 9.6e-08    | 2.83E+00      |
| 21 | GO:0002521 | leukocyte differentiation                   | 300       | 139         | 96.07    | 1.1e-07    | 3.09E+09      |
| 22 | GO:0007154 | cell communication                          | 2715      | 979         | 869.41   | 1.2e-07    | 3.22E+09      |
| 23 | GO:0002694 | regulation of leukocyte activation          | 242       | 116         | 77.49    | 1.4e-07    | 3.59E+09      |
| 24 | GO:0050865 | regulation of cell activation               | 260       | 123         | 83.26    | 1.5e-07    | 3.69E+00      |
| 25 | GO:0023051 | regulation of signaling                     | 1604      | 601         | 513.64   | 3.0e-07    | 7.08E-01      |
| 26 | GO:0010646 | regulation of cell communication            | 1609      | 602         | 515.24   | 3.7e-07    | 8.30E+09      |
| 27 | GO:0042127 | regulation of cell proliferation            | 779       | 313         | 249.45   | 3.8e-07    | 8.30E+09      |
| 28 | GO:0001819 | positive regulation of cytokine producti... | 162       | 82          | 51.88    | 5.8e-07    | 1.22E-04      |
| 29 | GO:0040011 | locomotion                                  | 744       | 299         | 238.25   | 7.0e-07    | 1.36E-04      |
| 30 | GO:1902107 | positive regulation of leukocyte differe... | 89        | 51          | 28.5     | 7.0e-07    | 1.36E-04      |
| 31 | GO:0009605 | response to external stimulus               | 888       | 350         | 284.36   | 7.2e-07    | 1.36E-04      |
| 32 | GO:0016477 | cell migration                              | 608       | 250         | 194.7    | 7.4e-07    | 1.36E-04      |
| 33 | GO:0001562 | response to protozoan                       | 23        | 19          | 7.37     | 8.1e-07    | 1.45E-04      |
| 34 | GO:0008283 | cell proliferation                          | 982       | 382         | 314.46   | 1.0e-06    | 1.73E-04      |
| 35 | GO:0007275 | multicellular organismal development        | 2314      | 836         | 741      | 1.2e-06    | 2.02E-04      |
| 36 | GO:0035556 | intracellular signal transduction           | 1455      | 545         | 465.93   | 1.3e-06    | 2.13E-04      |
| 37 | GO:1902531 | regulation of intracellular signal trans... | 957       | 372         | 306.45   | 1.6e-06    | 2.55E-04      |
| 38 | GO:0051046 | regulation of secretion                     | 288       | 130         | 92.22    | 1.7e-06    | 2.57E-04      |
| 39 | GO:0070372 | regulation of ERK1 and ERK2 cascade         | 112       | 60          | 35.87    | 1.7e-06    | 2.57E-04      |
| 40 | GO:0008284 | positive regulation of cell proliferatio... | 422       | 180         | 135.13   | 1.9e-06    | 2.80E-04      |
| 41 | GO:0042742 | defense response to bacterium               | 89        | 50          | 28.5     | 2.0e-06    | 2.81E-04      |
| 42 | GO:0009966 | regulation of signal transduction           | 1477      | 551         | 472.97   | 2.0e-06    | 2.81E-04      |
| 43 | GO:0046649 | lymphocyte activation                       | 366       | 159         | 117.2    | 2.1e-06    | 2.81E-04      |

|    |            |                                             |      |      |         |         |          |
|----|------------|---------------------------------------------|------|------|---------|---------|----------|
| 44 | GO:0048513 | organ development                           | 1498 | 558  | 479.7   | 2.1e-06 | 2.81E-04 |
| 45 | GO:0051241 | negative regulation of multicellular org... | 209  | 99   | 66.93   | 2.2e-06 | 2.88E-04 |
| 46 | GO:0009888 | tissue development                          | 884  | 345  | 283.08  | 2.6e-06 | 3.33E-04 |
| 47 | GO:0070371 | ERK1 and ERK2 cascade                       | 118  | 62   | 37.79   | 2.8e-06 | 3.37E-04 |
| 48 | GO:0048870 | cell motility                               | 642  | 259  | 205.58  | 2.8e-06 | 3.37E-04 |
| 49 | GO:0051674 | localization of cell                        | 642  | 259  | 205.58  | 2.8e-06 | 3.37E-04 |
| 50 | GO:0032879 | regulation of localization                  | 1094 | 418  | 350.33  | 2.9e-06 | 3.42E-04 |
| 51 | GO:0070663 | regulation of leukocyte proliferation       | 123  | 64   | 39.39   | 3.0e-06 | 3.47E-04 |
| 52 | GO:0060341 | regulation of cellular localization         | 532  | 219  | 170.36  | 3.3e-06 | 3.74E-04 |
| 53 | GO:0032944 | regulation of mononuclear cell prolifera... | 121  | 63   | 38.75   | 3.5e-06 | 3.89E-04 |
| 54 | GO:0050896 | response to stimulus                        | 3862 | 1341 | 1236.71 | 4.0e-06 | 4.37E-04 |
| 55 | GO:0045639 | positive regulation of myeloid cell diff... | 59   | 36   | 18.89   | 4.2e-06 | 4.50E-04 |
| 56 | GO:0002763 | positive regulation of myeloid leukocyte... | 38   | 26   | 12.17   | 4.4e-06 | 4.63E-04 |
| 57 | GO:0048518 | positive regulation of biological proces... | 2593 | 923  | 830.34  | 4.7e-06 | 4.86E-04 |
| 58 | GO:0044767 | single-organism developmental process       | 2733 | 969  | 875.17  | 5.2e-06 | 5.22E-04 |
| 59 | GO:0051249 | regulation of lymphocyte activation         | 215  | 100  | 68.85   | 5.4e-06 | 5.22E-04 |
| 60 | GO:0009306 | protein secretion                           | 132  | 67   | 42.27   | 5.4e-06 | 5.22E-04 |
| 61 | GO:0042832 | defense response to protozoan               | 21   | 17   | 6.72    | 5.4e-06 | 5.22E-04 |
| 62 | GO:0050670 | regulation of lymphocyte proliferation      | 120  | 62   | 38.43   | 5.7e-06 | 5.42E-04 |
| 63 | GO:0051049 | regulation of transport                     | 754  | 296  | 241.45  | 8.1e-06 | 7.58E-04 |
| 64 | GO:0031349 | positive regulation of defense response     | 136  | 68   | 43.55   | 9.0e-06 | 8.29E-04 |
| 65 | GO:0042116 | macrophage activation                       | 33   | 23   | 10.57   | 9.8e-06 | 8.85E-04 |
| 66 | GO:0048583 | regulation of response to stimulus          | 1828 | 664  | 585.37  | 9.9e-06 | 8.85E-04 |
| 67 | GO:0048519 | negative regulation of biological proces... | 2358 | 841  | 755.09  | 1.1e-05 | 9.54E-04 |
| 68 | GO:0070665 | positive regulation of leukocyte prolife... | 79   | 44   | 25.3    | 1.1e-05 | 9.54E-04 |
| 69 | GO:0048522 | positive regulation of cellular process     | 2353 | 839  | 753.49  | 1.2e-05 | 1.03E-03 |
| 70 | GO:0032946 | positive regulation of mononuclear cell ... | 77   | 43   | 24.66   | 1.3e-05 | 1.10E-03 |
| 71 | GO:0045595 | regulation of cell differentiation          | 781  | 304  | 250.1   | 1.4e-05 | 1.15E-03 |
| 72 | GO:0048731 | system development                          | 2020 | 727  | 646.85  | 1.4e-05 | 1.15E-03 |
| 73 | GO:0032940 | secretion by cell                           | 404  | 169  | 129.37  | 1.5e-05 | 1.21E-03 |
| 74 | GO:0032502 | developmental process                       | 2752 | 970  | 881.26  | 1.6e-05 | 1.28E-03 |
| 75 | GO:0050663 | cytokine secretion                          | 80   | 44   | 25.62   | 1.7e-05 | 1.34E-03 |
| 76 | GO:0030098 | lymphocyte differentiation                  | 194  | 90   | 62.12   | 1.8e-05 | 1.40E-03 |
| 77 | GO:0048869 | cellular developmental process              | 1946 | 701  | 623.16  | 1.9e-05 | 1.40E-03 |
| 78 | GO:0001568 | blood vessel development                    | 348  | 148  | 111.44  | 1.9e-05 | 1.40E-03 |
| 79 | GO:0001944 | vasculature development                     | 367  | 155  | 117.52  | 1.9e-05 | 1.40E-03 |
| 80 | GO:0050863 | regulation of T cell activation             | 146  | 71   | 46.75   | 1.9e-05 | 1.40E-03 |
| 81 | GO:0048523 | negative regulation of cellular process     | 2174 | 777  | 696.17  | 2.0e-05 | 1.44E-03 |
| 82 | GO:0050794 | regulation of cellular process              | 4989 | 1697 | 1597.6  | 2.0e-05 | 1.44E-03 |
| 83 | GO:0050867 | positive regulation of cell activation      | 154  | 74   | 49.31   | 2.2e-05 | 1.56E-03 |
| 84 | GO:0009617 | response to bacterium                       | 221  | 100  | 70.77   | 2.3e-05 | 1.58E-03 |
| 85 | GO:0050671 | positive regulation of lymphocyte prolif... | 76   | 42   | 24.34   | 2.3e-05 | 1.58E-03 |
| 86 | GO:0046903 | secretion                                   | 456  | 187  | 146.02  | 2.3e-05 | 1.58E-03 |
| 87 | GO:0051716 | cellular response to stimulus               | 3156 | 1101 | 1010.63 | 2.4e-05 | 1.63E-03 |
| 88 | GO:0051047 | positive regulation of secretion            | 162  | 77   | 51.88   | 2.5e-05 | 1.68E-03 |
| 89 | GO:0050793 | regulation of developmental process         | 1089 | 409  | 348.72  | 2.6e-05 | 1.69E-03 |
| 90 | GO:0072358 | cardiovascular system development           | 529  | 213  | 169.4   | 2.6e-05 | 1.69E-03 |
| 91 | GO:0072359 | circulatory system development              | 529  | 213  | 169.4   | 2.6e-05 | 1.69E-03 |

|     |            |                                             |      |      |         |         |          |
|-----|------------|---------------------------------------------|------|------|---------|---------|----------|
| 92  | GO:0048584 | positive regulation of response to stimu... | 910  | 347  | 291.4   | 2.7e-05 | 1.71E-03 |
| 93  | GO:0046883 | regulation of hormone secretion             | 93   | 49   | 29.78   | 2.7e-05 | 1.71E-03 |
| 94  | GO:0031347 | regulation of defense response              | 251  | 111  | 80.38   | 2.8e-05 | 1.76E-03 |
| 95  | GO:0002274 | myeloid leukocyte activation                | 98   | 51   | 31.38   | 2.9e-05 | 1.80E-03 |
| 96  | GO:0042107 | cytokine metabolic process                  | 72   | 40   | 23.06   | 3.0e-05 | 1.84E-03 |
| 97  | GO:0030154 | cell differentiation                        | 1792 | 647  | 573.84  | 3.2e-05 | 1.93E-03 |
| 98  | GO:0050789 | regulation of biological process            | 5262 | 1782 | 1685.02 | 3.2e-05 | 1.93E-03 |
| 99  | GO:0042110 | T cell activation                           | 247  | 109  | 79.1    | 3.7e-05 | 2.20E-03 |
| 100 | GO:0030334 | regulation of cell migration                | 352  | 148  | 112.72  | 3.8e-05 | 2.24E-03 |
| 101 | GO:0003008 | system process                              | 560  | 223  | 179.33  | 3.9e-05 | 2.28E-03 |
| 102 | GO:0070661 | leukocyte proliferation                     | 164  | 77   | 52.52   | 4.2e-05 | 2.41E-03 |
| 103 | GO:0051270 | regulation of cellular component movemen... | 402  | 166  | 128.73  | 4.2e-05 | 2.41E-03 |
| 104 | GO:0043367 | CD4-positive, alpha-beta T cell differen... | 35   | 23   | 11.21   | 4.3e-05 | 2.44E-03 |
| 105 | GO:0000122 | negative regulation of transcription fro... | 416  | 171  | 133.21  | 4.4e-05 | 2.47E-03 |
| 106 | GO:0044057 | regulation of system process                | 185  | 85   | 59.24   | 4.6e-05 | 2.56E-03 |
| 107 | GO:2000026 | regulation of multicellular organismal d... | 812  | 311  | 260.02  | 4.8e-05 | 2.65E-03 |
| 108 | GO:1903034 | regulation of response to wounding          | 193  | 88   | 61.8    | 4.9e-05 | 2.68E-03 |
| 109 | GO:0042089 | cytokine biosynthetic process               | 71   | 39   | 22.74   | 5.3e-05 | 2.87E-03 |
| 110 | GO:0009893 | positive regulation of metabolic process    | 1511 | 550  | 483.86  | 5.4e-05 | 2.90E-03 |
| 111 | GO:0019220 | regulation of phosphate metabolic proces... | 1065 | 398  | 341.04  | 5.5e-05 | 2.92E-03 |
| 112 | GO:0033002 | muscle cell proliferation                   | 95   | 49   | 30.42   | 5.6e-05 | 2.95E-03 |
| 113 | GO:0042108 | positive regulation of cytokine biosynth... | 44   | 27   | 14.09   | 5.7e-05 | 2.98E-03 |
| 114 | GO:0042035 | regulation of cytokine biosynthetic proc... | 62   | 35   | 19.85   | 5.9e-05 | 3.05E-03 |
| 115 | GO:0065007 | biological regulation                       | 5464 | 1843 | 1749.7  | 6.0e-05 | 3.08E-03 |
| 116 | GO:0051174 | regulation of phosphorus metabolic proce... | 1069 | 399  | 342.32  | 6.2e-05 | 3.13E-03 |
| 117 | GO:1902533 | positive regulation of intracellular sig... | 446  | 181  | 142.82  | 6.2e-05 | 3.13E-03 |
| 118 | GO:2000145 | regulation of cell motility                 | 369  | 153  | 118.16  | 6.5e-05 | 3.25E-03 |
| 119 | GO:0023056 | positive regulation of signaling            | 709  | 274  | 227.04  | 6.7e-05 | 3.32E-03 |
| 120 | GO:0045597 | positive regulation of cell differentiat... | 372  | 154  | 119.12  | 6.8e-05 | 3.34E-03 |
| 121 | GO:0002696 | positive regulation of leukocyte activat... | 148  | 70   | 47.39   | 6.9e-05 | 3.34E-03 |
| 122 | GO:0050776 | regulation of immune response               | 312  | 132  | 99.91   | 6.9e-05 | 3.34E-03 |
| 123 | GO:0006928 | cellular component movement                 | 824  | 314  | 263.86  | 7.0e-05 | 3.34E-03 |
| 124 | GO:0050708 | regulation of protein secretion             | 103  | 52   | 32.98   | 7.1e-05 | 3.34E-03 |
| 125 | GO:0048514 | blood vessel morphogenesis                  | 304  | 129  | 97.35   | 7.1e-05 | 3.34E-03 |
| 126 | GO:0032943 | mononuclear cell proliferation              | 161  | 75   | 51.56   | 7.2e-05 | 3.34E-03 |
| 127 | GO:0071396 | cellular response to lipid                  | 161  | 75   | 51.56   | 7.2e-05 | 3.34E-03 |
| 128 | GO:0002286 | T cell activation involved in immune res... | 38   | 24   | 12.17   | 7.7e-05 | 3.55E-03 |
| 129 | GO:0035914 | skeletal muscle cell differentiation        | 36   | 23   | 11.53   | 8.3e-05 | 3.79E-03 |
| 130 | GO:0051172 | negative regulation of nitrogen compound... | 731  | 281  | 234.08  | 8.4e-05 | 3.81E-03 |
| 131 | GO:1902105 | regulation of leukocyte differentiation     | 149  | 70   | 47.71   | 9.0e-05 | 4.05E-03 |
| 132 | GO:0048660 | regulation of smooth muscle cell prolife... | 70   | 38   | 22.42   | 9.2e-05 | 4.11E-03 |
| 133 | GO:0016310 | phosphorylation                             | 1217 | 448  | 389.71  | 9.4e-05 | 4.16E-03 |
| 134 | GO:0090087 | regulation of peptide transport             | 82   | 43   | 26.26   | 9.6e-05 | 4.16E-03 |
| 135 | GO:0071346 | cellular response to interferon-gamma       | 32   | 21   | 10.25   | 9.6e-05 | 4.16E-03 |
| 136 | GO:0010647 | positive regulation of cell communicatio... | 715  | 275  | 228.96  | 9.6e-05 | 4.16E-03 |
| 137 | GO:0048856 | anatomical structure development            | 2457 | 863  | 786.79  | 0.00010 | 4.27E-03 |
| 138 | GO:0045892 | negative regulation of transcription, DN... | 613  | 239  | 196.3   | 0.00010 | 4.27E-03 |
| 139 | GO:0046651 | lymphocyte proliferation                    | 160  | 74   | 51.24   | 0.00011 | 4.54E-03 |

|     |            |                                             |     |     |        |         |          |
|-----|------------|---------------------------------------------|-----|-----|--------|---------|----------|
| 140 | GO:0002292 | T cell differentiation involved in immun... | 26  | 18  | 8.33   | 0.00011 | 4.54E-03 |
| 141 | GO:0002293 | alpha-beta T cell differentiation involv... | 26  | 18  | 8.33   | 0.00011 | 4.54E-03 |
| 142 | GO:0001525 | angiogenesis                                | 247 | 107 | 79.1   | 0.00011 | 4.54E-03 |
| 143 | GO:0045655 | regulation of monocyte differentiation      | 8   | 8   | 2.56   | 0.00011 | 4.54E-03 |
| 144 | GO:0030856 | regulation of epithelial cell differenti... | 52  | 30  | 16.65  | 0.00012 | 4.88E-03 |
| 145 | GO:0046632 | alpha-beta T cell differentiation           | 52  | 30  | 16.65  | 0.00012 | 4.88E-03 |
| 146 | GO:0016525 | negative regulation of angiogenesis         | 41  | 25  | 13.13  | 0.00013 | 5.08E-03 |
| 147 | GO:0008202 | steroid metabolic process                   | 135 | 64  | 43.23  | 0.00013 | 5.08E-03 |
| 148 | GO:1902679 | negative regulation of RNA biosynthetic ... | 629 | 244 | 201.42 | 0.00013 | 5.08E-03 |
| 149 | GO:0051048 | negative regulation of secretion            | 78  | 41  | 24.98  | 0.00013 | 5.08E-03 |
| 150 | GO:0002764 | immune response-regulating signaling pat... | 153 | 71  | 48.99  | 0.00013 | 5.08E-03 |
